# Supplementary material for: Opto-combinatorial indexing enables high-content transcriptomics by linking cell images and transcriptomes
Source: Royal Society of Chemistry journal article supplement (doi:10.1039/d3lc00866e), 2024-01-01
Supplement: d3lc00866e2.pdf [file d3lc00866e2.pdf]

**Table S1. Sequences and modifications of the oligonucleotides used in this work.**

| Oligonucleotide Name | Oligonucleotide Sequence and Modification                                                         |
|----------------------|---------------------------------------------------------------------------------------------------|
| TypeA/B base PCR     | /5Acrd/AAGCAGTGGTATCAACGCAGAGTACGA CGCTCTT                                                        |
| Bridge_A             | AGATCGG AAGAGCG                                                                                   |
| Bridge_C             | GACTTGT CTAGAGC                                                                                   |
| Readout_Alexa647     | /Alexa647/GAGGGCGTTCAATCACTC                                                                      |
| Readout_Alexa488     | /Alexa488/GGAATAACGAAGCACCCA                                                                      |
| Readout_Alexa555     | /Alexa555/CTGTGTAGAGGGCGAGAC                                                                      |
| Readout_Alexa750     | /Alexa750/GGTGTGTGTGCTTCAAAC                                                                      |
| Readout_R0           | TGATGTTGACCTGCCGAG                                                                                |
| Readout_G0           | GAACCCAGGACATTCAG                                                                                 |
| Readout_P0           | AGCATTTACGGGATCACG                                                                                |
| Readout_B0           | GATTGGGAATGTCGCCA                                                                                 |
| Branch_00_NNNN       | CTGGAATGTCCTGGTTC CTCGCAGGTACAACATCA TGGCAGACATTCCTCAATC CGTGATCCCGTAAATGCT GTCTAATAGTTAGGCGCTAT  |
| Branch_01_NNNR       | CTGGAATGTCCTGGTTC GAGTGATTGAACGCCCTC TGGCAGACATTCCTCAATC CGTGATCCCGTAAATGCT TTCTGAGGACATACCTCGAC  |
| Branch_02_NNPN       | CTGGAATGTCCTGGTTC CTCGCAGGTACAACATCA TGGCAGACATTCCTCAATC GTCTCGCCCTCTACACAG AGCATAACGGCGTTCGGTATC |
| Branch_03_NNPR       | CTGGAATGTCCTGGTTC GAGTGATTGAACGCCCTC TGGCAGACATTCCTCAATC GTCTCGCCCTCTACACAG TAGCTGCTGTAGGTAACFT   |
| Branch_04_NGNN       | TGGGTGCTTCGTTATTCC CTCGCAGGTACAACATCA TGGCAGACATTCCTCAATC CGTGATCCCGTAAATGCT AAGCGTATATTCGCTCGAC  |
| Branch_05_NGNR       | TGGGTGCTTCGTTATTCC GAGTGATTGAACGCCCTC TGGCAGACATTCCTCAATC CGTGATCCCGTAAATGCT AATCTCGCGTTGAATCGCT  |
| Branch_06_NGPN       | TGGGTGCTTCGTTATTCC CTCGCAGGTACAACATCA TGGCAGACATTCCTCAATC GTCTCGCCCTCTACACAG GCCTTACCGTATAGGCTGFT |
| Branch_07_NGPR       | TGGGTGCTTCGTTATTCC GAGTGATTGAACGCCCTC TGGCAGACATTCCTCAATC GTCTCGCCCTCTACACAG CCGCAATCCGTTGGTAATA  |
| Branch_08_BNNN       | CTGGAATGTCCTGGTTC CTCGCAGGTACAACATCA GTTTGAAGCACACACACC CGTGATCCCGTAAATGCT TCCGAGACCATAGAGTCTCA   |
| Branch_09_BNNR       | CTGGAATGTCCTGGTTC GAGTGATTGAACGCCCTC GTTTGAAGCACACACACC CGTGATCCCGTAAATGCT GAGAGGATTTGCTCTCAGG    |
| Branch_10_BNPN       | CTGGAATGTCCTGGTTC CTCGCAGGTACAACATCA GTTTGAAGCACACACACC GTCTCGCCCTCTACACAG AAGGCCATCATTTAGCCAGFT  |
| Branch_11_BNPR       | CTGGAATGTCCTGGTTC GAGTGATTGAACGCCCTC GTTTGAAGCACACACACC GTCTCGCCCTCTACACAG AGCTGCCCTAAGGCATTCAT   |
| Branch_12_BGNN       | TGGGTGCTTCGTTATTCC CTCGCAGGTACAACATCA GTTTGAAGCACACACACC CGTGATCCCGTAAATGCT TCAATATCGACGAGTTGCGC  |
| Branch_13_BGNR       | TGGGTGCTTCGTTATTCC GAGTGATTGAACGCCCTC GTTTGAAGCACACACACC CGTGATCCCGTAAATGCT TTATGACCAACCGGTCCTAA  |
| Branch_14_BGPN       | TGGGTGCTTCGTTATTCC CTCGCAGGTACAACATCA GTTTGAAGCACACACACC GTCTCGCCCTCTACACAG GTAGGAACCAATCCAACATC  |
| Branch_15_BGPR       | TGGGTGCTTCGTTATTCC GAGTGATTGAACGCCCTC GTTTGAAGCACACACACC GTCTCGCCCTCTACACAG GTTCTCTCTTCGGGAGGAA   |
| Stem_CC00_ID01       | CCGATCT ATAGGCCTCACCTATTAGAC CATCOGTA GCTCTAG                                                     |
| Stem_CC00_ID02       | CCGATCT ATAGGCCTCACCTATTAGAC GTCTAGT GCTCTAG                                                      |
| Stem_CC00_ID03       | CCGATCT ATAGGCCTCACCTATTAGAC CGGAAGAA GCTCTAG                                                     |
| Stem_CC00_ID04       | CCGATCT ATAGGCCTCACCTATTAGAC GCCAAGAA GCTCTAG                                                     |
| Stem_CC00_ID05       | CCGATCT ATAGGCCTCACCTATTAGAC GGAGAGAA GCTCTAG                                                     |
| Stem_CC00_ID06       | CCGATCT ATAGGCCTCACCTATTAGAC ACGGAGAA GCTCTAG                                                     |
| Stem_CC00_ID07       | CCGATCT ATAGGCCTCACCTATTAGAC CACGAGAA GCTCTAG                                                     |
| Stem_CC00_ID08       | CCGATCT ATAGGCCTCACCTATTAGAC CCACAGAA GCTCTAG                                                     |
| Stem_CC00_ID09       | CCGATCT ATAGGCCTCACCTATTAGAC GAGCAGAA GCTCTAG                                                     |
| Stem_CC00_ID10       | CCGATCT ATAGGCCTCACCTATTAGAC AGCCAGAA GCTCTAG                                                     |
| Stem_CC00_ID11       | CCGATCT ATAGGCCTCACCTATTAGAC TCGAGGAA GCTCTAG                                                     |
| Stem_CC00_ID12       | CCGATCT ATAGGCCTCACCTATTAGAC CTCAGGAA GCTCTAG                                                     |
| Stem_CC00_ID13       | CCGATCT ATAGGCCTCACCTATTAGAC GGTAGGAA GCTCTAG                                                     |
| Stem_CC00_ID14       | CCGATCT ATAGGCCTCACCTATTAGAC TGACGGAA GCTCTAG                                                     |
| Stem_CC00_ID15       | CCGATCT ATAGGCCTCACCTATTAGAC ATGCGGAA GCTCTAG                                                     |
| Stem_CC00_ID16       | CCGATCT ATAGGCCTCACCTATTAGAC GCATGGAA GCTCTAG                                                     |
| Stem_CC00_ID17       | CCGATCT ATAGGCCTCACCTATTAGAC CAGTGGAA GCTCTAG                                                     |
| Stem_CC00_ID21       | CCGATCT ATAGGCCTCACCTATTAGAC TCACGGAA GCTCTAG                                                     |
| Stem_CC00_ID22       | CCGATCT ATAGGCCTCACCTATTAGAC ATCGOGAA GCTCTAG                                                     |
| Stem_CC00_ID24       | CCGATCT ATAGGCCTCACCTATTAGAC CGATCGAA GCTCTAG                                                     |
| Stem_CC01_ID01       | CCGATCT GTCGAGGTATGTCCTCAGAA CATCCGTA GCTCTAG                                                     |
| Stem_CC01_ID02       | CCGATCT GTCGAGGTATGTCCTCAGAA GTCTAGT GCTCTAG                                                      |
| Stem_CC01_ID03       | CCGATCT GTCGAGGTATGTCCTCAGAA CGGAAGAA GCTCTAG                                                     |
| Stem_CC01_ID04       | CCGATCT GTCGAGGTATGTCCTCAGAA GCCAAGAA GCTCTAG                                                     |
| Stem_CC01_ID06       | CCGATCT GTCGAGGTATGTCCTCAGAA ACGGAGAA GCTCTAG                                                     |
| Stem_CC01_ID08       | CCGATCT GTCGAGGTATGTCCTCAGAA CCACAGAA GCTCTAG                                                     |
| Stem_CC01_ID09       | CCGATCT GTCGAGGTATGTCCTCAGAA GAGCAGAA GCTCTAG                                                     |
| Stem_CC01_ID10       | CCGATCT GTCGAGGTATGTCCTCAGAA AGCCAGAA GCTCTAG                                                     |
| Stem_CC01_ID11       | CCGATCT GTCGAGGTATGTCCTCAGAA TCGAGGAA GCTCTAG                                                     |
| Stem_CC01_ID12       | CCGATCT GTCGAGGTATGTCCTCAGAA CTCAGGAA GCTCTAG                                                     |
| Stem_CC01_ID13       | CCGATCT GTCGAGGTATGTCCTCAGAA GGTAGGAA GCTCTAG                                                     |
| Stem_CC01_ID14       | CCGATCT GTCGAGGTATGTCCTCAGAA TGACGGAA GCTCTAG                                                     |
| Stem_CC01_ID15       | CCGATCT GTCGAGGTATGTCCTCAGAA ATGCGGAA GCTCTAG                                                     |
| Stem_CC01_ID16       | CCGATCT GTCGAGGTATGTCCTCAGAA GCATGGAA GCTCTAG                                                     |
| Stem_CC01_ID17       | CCGATCT GTCGAGGTATGTCCTCAGAA CAGTGGAA GCTCTAG                                                     |
| Stem_CC01_ID21       | CCGATCT GTCGAGGTATGTCCTCAGAA TCACGGAA GCTCTAG                                                     |
| Stem_CC01_ID22       | CCGATCT GTCGAGGTATGTCCTCAGAA ATCGOGAA GCTCTAG                                                     |
| Stem_CC01_ID23       | CCGATCT GTCGAGGTATGTCCTCAGAA GATCGGAA GCTCTAG                                                     |
| Stem_CC01_ID24       | CCGATCT GTCGAGGTATGTCCTCAGAA CGATCGAA GCTCTAG                                                     |
| Stem_CC01_ID25       | CCGATCT GTCGAGGTATGTCCTCAGAA CTGGTAA GCTCTAG                                                      |
| Stem_CC02_ID02       | CCGATCT GATACGGAAACGCCGTATGCT GTCTAGT GCTCTAG                                                     |
| Stem_CC02_ID03       | CCGATCT GATACGGAAACGCCGTATGCT CGGAAGAA GCTCTAG                                                    |
| Stem_CC02_ID05       | CCGATCT GATACGGAAACGCCGTATGCT GGAGAGAA GCTCTAG                                                    |
| Stem_CC02_ID06       | CCGATCT GATACGGAAACGCCGTATGCT ACGGAGAA GCTCTAG                                                    |
| Stem_CC02_ID07       | CCGATCT GATACGGAAACGCCGTATGCT CACGAGAA GCTCTAG                                                    |
| Stem_CC02_ID08       | CCGATCT GATACGGAAACGCCGTATGCT CCACAGAA GCTCTAG                                                    |
| Stem_CC02_ID09       | CCGATCT GATACGGAAACGCCGTATGCT GAGCAGAA GCTCTAG                                                    |
| Stem_CC02_ID10       | CCGATCT GATACGGAAACGCCGTATGCT AGCCAGAA GCTCTAG                                                    |
| Stem_CC02_ID12       | CCGATCT GATACGGAAACGCCGTATGCT CTCAGGAA GCTCTAG                                                    |
| Stem_CC02_ID14       | CCGATCT GATACGGAAACGCCGTATGCT TGACGGAA GCTCTAG                                                    |
| Stem_CC02_ID15       | CCGATCT GATACGGAAACGCCGTATGCT ATGCGGAA GCTCTAG                                                    |
| Stem_CC02_ID16       | CCGATCT GATACGGAAACGCCGTATGCT GCATGGAA GCTCTAG                                                    |
| Stem_CC02_ID17       | CCGATCT GATACGGAAACGCCGTATGCT CAGTGGAA GCTCTAG                                                    |
| Stem_CC02_ID22       | CCGATCT GATACGGAAACGCCGTATGCT ATCGOGAA GCTCTAG                                                    |
| Stem_CC02_ID24       | CCGATCT GATACGGAAACGCCGTATGCT CGATCGAA GCTCTAG                                                    |
| Stem_CC02_ID25       | CCGATCT GATACGGAAACGCCGTATGCT CTGGTAA GCTCTAG                                                     |
| Stem_CC02_ID26       | CCGATCT GATACGGAAACGCCGTATGCT GTCCGAA GCTCTAG                                                     |
| Stem_CC02_ID32       | CCGATCT GATACGGAAACGCCGTATGCT CTCACAA GCTCTAG                                                     |
| Stem_CC02_ID33       | CCGATCT GATACGGAAACGCCGTATGCT GGCACAA GCTCTAG                                                     |
| Stem_CC02_ID35       | CCGATCT GATACGGAAACGCCGTATGCT GAGAGCAA GCTCTAG                                                    |
| Stem_CC03_ID02       | CCGATCT AAGTTACCTAGCAGCAGCTA GTCTAGT GCTCTAG                                                      |
| Stem_CC03_ID03       | CCGATCT AAGTTACCTAGCAGCAGCTA CGGAAGAA GCTCTAG                                                     |
| Stem_CC03_ID04       | CCGATCT AAGTTACCTAGCAGCAGCTA GCCAAGAA GCTCTAG                                                     |
| Stem_CC03_ID05       | CCGATCT AAGTTACCTAGCAGCAGCTA GGAGAGAA GCTCTAG                                                     |
| Stem_CC03_ID06       | CCGATCT AAGTTACCTAGCAGCAGCTA ACGGAGAA GCTCTAG                                                     |
| Stem_CC03_ID08       | CCGATCT AAGTTACCTAGCAGCAGCTA CCACAGAA GCTCTAG                                                     |
| Stem_CC03_ID10       | CCGATCT AAGTTACCTAGCAGCAGCTA AGCCAGAA GCTCTAG                                                     |
| Stem_CC03_ID12       | CCGATCT AAGTTACCTAGCAGCAGCTA CTCAGGAA GCTCTAG                                                     |
| Stem_CC03_ID13       | CCGATCT AAGTTACCTAGCAGCAGCTA GGTAGGAA GCTCTAG                                                     |
| Stem_CC03_ID14       | CCGATCT AAGTTACCTAGCAGCAGCTA TGACGGAA GCTCTAG                                                     |



|                |         |                      |           |         |
|----------------|---------|----------------------|-----------|---------|
| Stem_CC08_ID12 | CCGATCT | TGAGACTCTATGGTCTCGGA | CTCAGGAA  | GCTCTAG |
| Stem_CC08_ID13 | CCGATCT | TGAGACTCTATGGTCTCGGA | GGTAGGAA  | GCTCTAG |
| Stem_CC08_ID14 | CCGATCT | TGAGACTCTATGGTCTCGGA | TGACGGAA  | GCTCTAG |
| Stem_CC08_ID15 | CCGATCT | TGAGACTCTATGGTCTCGGA | ATGCGGAA  | GCTCTAG |
| Stem_CC08_ID16 | CCGATCT | TGAGACTCTATGGTCTCGGA | GCATGGAA  | GCTCTAG |
| Stem_CC08_ID17 | CCGATCT | TGAGACTCTATGGTCTCGGA | CAGTGGAA  | GCTCTAG |
| Stem_CC08_ID25 | CCGATCT | TGAGACTCTATGGTCTCGGA | CTGGTAA   | GCTCTAG |
| Stem_CC08_ID26 | CCGATCT | TGAGACTCTATGGTCTCGGA | GTCCGTAA  | GCTCTAG |
| Stem_CC08_ID29 | CCGATCT | TGAGACTCTATGGTCTCGGA | TGCACAAA  | GCTCTAG |
| Stem_CC08_ID30 | CCGATCT | TGAGACTCTATGGTCTCGGA | CCTGACAA  | GCTCTAG |
| Stem_CC08_ID31 | CCGATCT | TGAGACTCTATGGTCTCGGA | TGCACAAA  | GCTCTAG |
| Stem_CC09_ID00 | CCGATCT | CCTGAGAGCAAATTCCTCTC | TGGCATGA  | GCTCTAG |
| Stem_CC09_ID01 | CCGATCT | CCTGAGAGCAAATTCCTCTC | CATCCGTA  | GCTCTAG |
| Stem_CC09_ID03 | CCGATCT | CCTGAGAGCAAATTCCTCTC | CGGAAGAA  | GCTCTAG |
| Stem_CC09_ID05 | CCGATCT | CCTGAGAGCAAATTCCTCTC | GGAGAGAA  | GCTCTAG |
| Stem_CC09_ID06 | CCGATCT | CCTGAGAGCAAATTCCTCTC | ACGGAGAA  | GCTCTAG |
| Stem_CC09_ID08 | CCGATCT | CCTGAGAGCAAATTCCTCTC | CCACAGAA  | GCTCTAG |
| Stem_CC09_ID10 | CCGATCT | CCTGAGAGCAAATTCCTCTC | AGCCAGAA  | GCTCTAG |
| Stem_CC09_ID11 | CCGATCT | CCTGAGAGCAAATTCCTCTC | TCGAGGAA  | GCTCTAG |
| Stem_CC09_ID12 | CCGATCT | CCTGAGAGCAAATTCCTCTC | CTCAGGAA  | GCTCTAG |
| Stem_CC09_ID13 | CCGATCT | CCTGAGAGCAAATTCCTCTC | GGTAGGAA  | GCTCTAG |
| Stem_CC09_ID14 | CCGATCT | CCTGAGAGCAAATTCCTCTC | TGACGGAA  | GCTCTAG |
| Stem_CC09_ID15 | CCGATCT | CCTGAGAGCAAATTCCTCTC | ATGCGGAA  | GCTCTAG |
| Stem_CC09_ID16 | CCGATCT | CCTGAGAGCAAATTCCTCTC | GCATGGAA  | GCTCTAG |
| Stem_CC09_ID17 | CCGATCT | CCTGAGAGCAAATTCCTCTC | CAGTGGAA  | GCTCTAG |
| Stem_CC09_ID22 | CCGATCT | CCTGAGAGCAAATTCCTCTC | ATCGGGAA  | GCTCTAG |
| Stem_CC09_ID24 | CCGATCT | CCTGAGAGCAAATTCCTCTC | CGATCGAA  | GCTCTAG |
| Stem_CC09_ID26 | CCGATCT | CCTGAGAGCAAATTCCTCTC | GTCCGTAA  | GCTCTAG |
| Stem_CC09_ID27 | CCGATCT | CCTGAGAGCAAATTCCTCTC | CGTCTGAA  | GCTCTAG |
| Stem_CC09_ID28 | CCGATCT | CCTGAGAGCAAATTCCTCTC | GTGGACAA  | GCTCTAG |
| Stem_CC09_ID29 | CCGATCT | CCTGAGAGCAAATTCCTCTC | TGCGACAA  | GCTCTAG |
| Stem_CC10_ID00 | CCGATCT | ACCTGGCCAATGATGGCCCT | TGGCATGA  | GCTCTAG |
| Stem_CC10_ID01 | CCGATCT | ACCTGGCCAATGATGGCCCT | CATCCGTA  | GCTCTAG |
| Stem_CC10_ID02 | CCGATCT | ACCTGGCCAATGATGGCCCT | GTCTAGTG  | GCTCTAG |
| Stem_CC10_ID03 | CCGATCT | ACCTGGCCAATGATGGCCCT | CGGAAGAA  | GCTCTAG |
| Stem_CC10_ID05 | CCGATCT | ACCTGGCCAATGATGGCCCT | GGAGAGAA  | GCTCTAG |
| Stem_CC10_ID07 | CCGATCT | ACCTGGCCAATGATGGCCCT | CACGAGAA  | GCTCTAG |
| Stem_CC10_ID08 | CCGATCT | ACCTGGCCAATGATGGCCCT | CCACAGAA  | GCTCTAG |
| Stem_CC10_ID09 | CCGATCT | ACCTGGCCAATGATGGCCCT | GAGCAGAA  | GCTCTAG |
| Stem_CC10_ID10 | CCGATCT | ACCTGGCCAATGATGGCCCT | AGCCAGAA  | GCTCTAG |
| Stem_CC10_ID12 | CCGATCT | ACCTGGCCAATGATGGCCCT | CTCAGGAA  | GCTCTAG |
| Stem_CC10_ID13 | CCGATCT | ACCTGGCCAATGATGGCCCT | GGTAGGAA  | GCTCTAG |
| Stem_CC10_ID14 | CCGATCT | ACCTGGCCAATGATGGCCCT | TGACGGAA  | GCTCTAG |
| Stem_CC10_ID15 | CCGATCT | ACCTGGCCAATGATGGCCCT | ATGCGGAA  | GCTCTAG |
| Stem_CC10_ID16 | CCGATCT | ACCTGGCCAATGATGGCCCT | GCATGGAA  | GCTCTAG |
| Stem_CC10_ID17 | CCGATCT | ACCTGGCCAATGATGGCCCT | CAGTGGAA  | GCTCTAG |
| Stem_CC10_ID21 | CCGATCT | ACCTGGCCAATGATGGCCCT | TCACGAGAA | GCTCTAG |
| Stem_CC10_ID22 | CCGATCT | ACCTGGCCAATGATGGCCCT | ATCGCGAA  | GCTCTAG |
| Stem_CC10_ID24 | CCGATCT | ACCTGGCCAATGATGGCCCT | CGATCGAA  | GCTCTAG |
| Stem_CC10_ID25 | CCGATCT | ACCTGGCCAATGATGGCCCT | CTGGTAA   | GCTCTAG |
| Stem_CC10_ID26 | CCGATCT | ACCTGGCCAATGATGGCCCT | GTCCGTAA  | GCTCTAG |
| Stem_CC11_ID00 | CCGATCT | ATGAATGCCTTGAGGCAGCT | TGGCATGA  | GCTCTAG |
| Stem_CC11_ID01 | CCGATCT | ATGAATGCCTTGAGGCAGCT | CATCCGTA  | GCTCTAG |
| Stem_CC11_ID02 | CCGATCT | ATGAATGCCTTGAGGCAGCT | GTCTAGTG  | GCTCTAG |
| Stem_CC11_ID03 | CCGATCT | ATGAATGCCTTGAGGCAGCT | CGGAAGAA  | GCTCTAG |
| Stem_CC11_ID05 | CCGATCT | ATGAATGCCTTGAGGCAGCT | GGAGAGAA  | GCTCTAG |
| Stem_CC11_ID06 | CCGATCT | ATGAATGCCTTGAGGCAGCT | ACGGAGAA  | GCTCTAG |
| Stem_CC11_ID07 | CCGATCT | ATGAATGCCTTGAGGCAGCT | CACGAGAA  | GCTCTAG |
| Stem_CC11_ID08 | CCGATCT | ATGAATGCCTTGAGGCAGCT | CCACAGAA  | GCTCTAG |
| Stem_CC11_ID09 | CCGATCT | ATGAATGCCTTGAGGCAGCT | GAGCAGAA  | GCTCTAG |
| Stem_CC11_ID10 | CCGATCT | ATGAATGCCTTGAGGCAGCT | AGCCAGAA  | GCTCTAG |
| Stem_CC11_ID11 | CCGATCT | ATGAATGCCTTGAGGCAGCT | TCGAGGAA  | GCTCTAG |
| Stem_CC11_ID12 | CCGATCT | ATGAATGCCTTGAGGCAGCT | CTCAGGAA  | GCTCTAG |
| Stem_CC11_ID14 | CCGATCT | ATGAATGCCTTGAGGCAGCT | TGACGGAA  | GCTCTAG |
| Stem_CC11_ID15 | CCGATCT | ATGAATGCCTTGAGGCAGCT | ATGCGGAA  | GCTCTAG |
| Stem_CC11_ID16 | CCGATCT | ATGAATGCCTTGAGGCAGCT | GCATGGAA  | GCTCTAG |
| Stem_CC11_ID17 | CCGATCT | ATGAATGCCTTGAGGCAGCT | CAGTGGAA  | GCTCTAG |
| Stem_CC11_ID19 | CCGATCT | ATGAATGCCTTGAGGCAGCT | TGCACGAA  | GCTCTAG |
| Stem_CC11_ID21 | CCGATCT | ATGAATGCCTTGAGGCAGCT | TCACGAGAA | GCTCTAG |
| Stem_CC11_ID22 | CCGATCT | ATGAATGCCTTGAGGCAGCT | ATCGCGAA  | GCTCTAG |
| Stem_CC11_ID24 | CCGATCT | ATGAATGCCTTGAGGCAGCT | CGATCGAA  | GCTCTAG |
| Stem_CC12_ID01 | CCGATCT | GGCGAACTCGTCGATATTGA | CATCCGTA  | GCTCTAG |
| Stem_CC12_ID02 | CCGATCT | GGCGAACTCGTCGATATTGA | GTCTAGTG  | GCTCTAG |
| Stem_CC12_ID03 | CCGATCT | GGCGAACTCGTCGATATTGA | CGGAAGAA  | GCTCTAG |
| Stem_CC12_ID04 | CCGATCT | GGCGAACTCGTCGATATTGA | GCCAAGAA  | GCTCTAG |
| Stem_CC12_ID07 | CCGATCT | GGCGAACTCGTCGATATTGA | CACGAGAA  | GCTCTAG |
| Stem_CC12_ID08 | CCGATCT | GGCGAACTCGTCGATATTGA | CCACAGAA  | GCTCTAG |
| Stem_CC12_ID09 | CCGATCT | GGCGAACTCGTCGATATTGA | GAGCAGAA  | GCTCTAG |
| Stem_CC12_ID10 | CCGATCT | GGCGAACTCGTCGATATTGA | AGCCAGAA  | GCTCTAG |
| Stem_CC12_ID12 | CCGATCT | GGCGAACTCGTCGATATTGA | CTCAGGAA  | GCTCTAG |
| Stem_CC12_ID14 | CCGATCT | GGCGAACTCGTCGATATTGA | TGACGGAA  | GCTCTAG |
| Stem_CC12_ID15 | CCGATCT | GGCGAACTCGTCGATATTGA | ATGCGGAA  | GCTCTAG |
| Stem_CC12_ID16 | CCGATCT | GGCGAACTCGTCGATATTGA | GCATGGAA  | GCTCTAG |
| Stem_CC12_ID17 | CCGATCT | GGCGAACTCGTCGATATTGA | CAGTGGAA  | GCTCTAG |
| Stem_CC12_ID21 | CCGATCT | GGCGAACTCGTCGATATTGA | TCAGCGAA  | GCTCTAG |
| Stem_CC12_ID23 | CCGATCT | GGCGAACTCGTCGATATTGA | GATGCGAA  | GCTCTAG |
| Stem_CC12_ID25 | CCGATCT | GGCGAACTCGTCGATATTGA | CTGGTAA   | GCTCTAG |
| Stem_CC12_ID26 | CCGATCT | GGCGAACTCGTCGATATTGA | GTCCGTAA  | GCTCTAG |
| Stem_CC12_ID27 | CCGATCT | GGCGAACTCGTCGATATTGA | CGTCTGAA  | GCTCTAG |
| Stem_CC12_ID29 | CCGATCT | GGCGAACTCGTCGATATTGA | TGCACAAA  | GCTCTAG |
| Stem_CC12_ID30 | CCGATCT | GGCGAACTCGTCGATATTGA | CCTGACAA  | GCTCTAG |
| Stem_CC13_ID01 | CCGATCT | TTAGGACCGGTTGGTCATAA | CATCCGTA  | GCTCTAG |
| Stem_CC13_ID02 | CCGATCT | TTAGGACCGGTTGGTCATAA | GTCTAGTG  | GCTCTAG |
| Stem_CC13_ID03 | CCGATCT | TTAGGACCGGTTGGTCATAA | CGGAAGAA  | GCTCTAG |
| Stem_CC13_ID04 | CCGATCT | TTAGGACCGGTTGGTCATAA | GCCAAGAA  | GCTCTAG |
| Stem_CC13_ID06 | CCGATCT | TTAGGACCGGTTGGTCATAA | ACGGAGAA  | GCTCTAG |
| Stem_CC13_ID07 | CCGATCT | TTAGGACCGGTTGGTCATAA | CACGAGAA  | GCTCTAG |
| Stem_CC13_ID08 | CCGATCT | TTAGGACCGGTTGGTCATAA | CCACAGAA  | GCTCTAG |
| Stem_CC13_ID09 | CCGATCT | TTAGGACCGGTTGGTCATAA | GAGCAGAA  | GCTCTAG |



Table S2. Primer and oligonucleotides sequences used in this work.

barcoded oligo-dT primers & TSO

| barcode                                               | sequence                                                       |
|-------------------------------------------------------|----------------------------------------------------------------|
| ATCTGTGA                                              | AGACGTGTGCTCTTCCGATCTATCCTGTABAAAAAAAAAAAAAAAAAAAAAAAAAAAAAAAA |
| ATTGAGGA                                              | AGACGTGTGCTCTTCCGATCTATTGAGGABAAAAAAAAAAAAAAAAAAAAAAAAAAAAAAAA |
| CAACCACA                                              | AGACGTGTGCTCTTCCGATCTCAACCACABAAAAAAAAAAAAAAAAAAAAAAAAAAAAAAAA |
| GACTAGTA                                              | AGACGTGTGCTCTTCCGATCTGACTAGTABAAAAAAAAAAAAAAAAAAAAAAAAAAAAAAAA |
| CAATGGAA                                              | AGACGTGTGCTCTTCCGATCTCAATGGAABAAAAAAAAAAAAAAAAAAAAAAAAAAAAAAAA |
| CACTTCGA                                              | AGACGTGTGCTCTTCCGATCTCACTTCGABAAAAAAAAAAAAAAAAAAAAAAAAAAAAAAAA |
| CAGCGTTA                                              | AGACGTGTGCTCTTCCGATCTCAGCGTABAAAAAAAAAAAAAAAAAAAAAAAAAAAAAAAA  |
| CATACCAA                                              | AGACGTGTGCTCTTCCGATCTCATACCAABAAAAAAAAAAAAAAAAAAAAAAAAAAAAAAAA |
| CCAGTTCA                                              | AGACGTGTGCTCTTCCGATCTCCAGTTABAAAAAAAAAAAAAAAAAAAAAAAAAAAAAAAA  |
| CCGAAGTA                                              | AGACGTGTGCTCTTCCGATCTCCGAAGTABAAAAAAAAAAAAAAAAAAAAAAAAAAAAAAAA |
| CCGTGAGA                                              | AGACGTGTGCTCTTCCGATCTCCGTGAGABAAAAAAAAAAAAAAAAAAAAAAAAAAAAAAAA |
| CCTCTGA                                               | AGACGTGTGCTCTTCCGATCTCCTCTGABAAAAAAAAAAAAAAAAAAAAAAAAAAAAAAAA  |
| CGAACTTA                                              | AGACGTGTGCTCTTCCGATCTCGAACTTABAAAAAAAAAAAAAAAAAAAAAAAAAAAAAAAA |
| CGACTGGA                                              | AGACGTGTGCTCTTCCGATCTCGACTGABAAAAAAAAAAAAAAAAAAAAAAAAAAAAAAAA  |
| CGCATACA                                              | AGACGTGTGCTCTTCCGATCTCGCATACABAAAAAAAAAAAAAAAAAAAAAAAAAAAAAAAA |
| CTCAATGA                                              | AGACGTGTGCTCTTCCGATCTCTCAATGABAAAAAAAAAAAAAAAAAAAAAAAAAAAAAAAA |
| biotinylated template switching oligonucleotide (TSO) | BiO-AAGCAGTGGTATCAACGCAGATCrfGrG+                              |

SeqAmp PCR primers

| name            | sequence               |
|-----------------|------------------------|
| primer2         | AAGCAGTGGTATCAACGCAGAT |
| additive primer | AGACGTGTGCTCTTCCGATCT  |

Indexing primers (TruSeq P5)

| name | sequence                                                               |
|------|------------------------------------------------------------------------|
| 501  | AATGATACGGCGACCACCGAGATCTACACTAGATCGCACACTCTTTCCCTACACGACGCTCTTCCGATCT |
| 502  | AATGATACGGCGACCACCGAGATCTACACTCTCTATACACTCTTTCCCTACACGACGCTCTTCCGATCT  |
| 503  | AATGATACGGCGACCACCGAGATCTACACTATCCTCTACACTCTTTCCCTACACGACGCTCTTCCGATCT |
| 504  | AATGATACGGCGACCACCGAGATCTACACAGTAGAAGACTCTTTCCCTACACGACGCTCTTCCGATCT   |
| 505  | AATGATACGGCGACCACCGAGATCTACACGTAAGGAGACACTCTTTCCCTACACGACGCTCTTCCGATCT |
| 506  | AATGATACGGCGACCACCGAGATCTACACACTGCATAACACTCTTTCCCTACACGACGCTCTTCCGATCT |
| 507  | AATGATACGGCGACCACCGAGATCTACACAAGGAGTAACTCTTTCCCTACACGACGCTCTTCCGATCT   |
| 508  | AATGATACGGCGACCACCGAGATCTACACCTAAGCTTACACTCTTTCCCTACACGACGCTCTTCCGATCT |

Indexing primers (TruSeq DNA Methylation P7)

| name                    | sequence                                                         |
|-------------------------|------------------------------------------------------------------|
| TruSeq_DNA_Methy_index1 | CAAGCAGAAGACGGCATACGAGATATCACGGTACTGGAGTTCAGACGTGTGCTCTTCCGATCT  |
| TruSeq_DNA_Methy_index2 | CAAGCAGAAGACGGCATACGAGATCGATGTGTGACTGGAGTTCAGACGTGTGCTCTTCCGATCT |
| TruSeq_DNA_Methy_index3 | CAAGCAGAAGACGGCATACGAGATTAGGCGTACTGGAGTTCAGACGTGTGCTCTTCCGATCT   |
| TruSeq_DNA_Methy_index4 | CAAGCAGAAGACGGCATACGAGATTGACCACTGACTGGAGTTCAGACGTGTGCTCTTCCGATCT |
| TruSeq_DNA_Methy_index5 | CAAGCAGAAGACGGCATACGAGATACAGTGTGACTGGAGTTCAGACGTGTGCTCTTCCGATCT  |
| TruSeq_DNA_Methy_index6 | CAAGCAGAAGACGGCATACGAGATGCCAATGTGACTGGAGTTCAGACGTGTGCTCTTCCGATCT |
| TruSeq_DNA_Methy_index7 | CAAGCAGAAGACGGCATACGAGATCAGATCGTACTGGAGTTCAGACGTGTGCTCTTCCGATCT  |
| TruSeq_DNA_Methy_index8 | CAAGCAGAAGACGGCATACGAGATACTTGGTACTGGAGTTCAGACGTGTGCTCTTCCGATCT   |
